# Supplementary material for: Evaluation of CIN2/3 Lesion Regression in GynTect® DNA Methylation-Marker-Negative Patients in a Longitudinal Study
Source: MDPI journal article supplement (doi:10.3390/cancers15153951), 2023-08-03
Supplement: s1 [file s1]

Archive with 1 entries (1 files):
- cancers-2520637-supplementary.pdf
