# Supplementary material for: Evaluation of CIN2/3 Lesion Regression in GynTect® DNA Methylation-Marker-Negative Patients in a Longitudinal Study
Source: MDPI journal article supplement (doi:10.3390/cancers15153951), 2023-08-03
Supplement: s1 [file s1 › cancers-2520637-supplementary.pdf]

**Table S1.** Characteristics of CIN2/3 patients for prognostic evaluation of the GynTest methylation status.

| <b>Demographic and baseline standard test data</b> | <b>CIN2<br/>(n=24)</b> | <b>CIN3<br/>(n=36)</b> |
|----------------------------------------------------|------------------------|------------------------|
| Age [years], median (range)                        | 22 (20-29)             | 22.5 (18-25)           |
| Number of live births, n (%)                       |                        |                        |
| None                                               | 23 (96%)               | 33 (92%)               |
| One                                                | 1 (4%)                 | 3 (8%)                 |
| Any contraception, n (%)                           | 21 (88%)               | 27 (75%)               |
| By birth control pill, n/valid* (%)                | 14/21 (67%)            | 21/27 (78%)            |
| By condom. n/valid* (%)                            | 4/21 (19%)             | 4/27 (15%)             |
| Smoker, n (%)                                      |                        |                        |
| No                                                 | 11 (46%)               | 13 (36%)               |
| Previous                                           | 1 (4%)                 | 2 (6%)                 |
| Current                                            | 11 (46%)               | 20 (56%)               |
| Unknown                                            | 1 (4%)                 | 1 (3%)                 |
| <b>Standard tests at baseline, n/valid* (%)</b>    |                        |                        |
| High risk HPV                                      | 23/24 (96%)            | 29/29 (100%)           |
| HPV16                                              | 8/23 (35%)             | 14/29 (48%)            |
| HPV18                                              | 0/23 (0%)              | 3/29 (10%)             |
| Liquid based cytology (Munich III nomenclature)    |                        |                        |
| I                                                  | 0/23 (0%)              | 1/12 (3%)              |
| II-a                                               | 0/23 (0%)              | 2/29 (7%)              |
| II-p                                               | 1/23 (4%)              | 0/29 (0%)              |
| IIID-1                                             | 10/23 (44%)            | 1/29 (3%)              |
| IIID-2                                             | 10/23 (44%)            | 15/29 (52%)            |
| IVa-p                                              | 2/23 (9%)              | 10/29 (35%)            |
| ≤ LSIL                                             | 11/23 (48%)            | 4/29 (14%)             |
| HSIL                                               | 12/23 (52%)            | 25/29 (86%)            |

\* Valid: Total number of patients without missing data

Abbr.: CIN - Cervical intraepithelial neoplasia; LSIL (HSIL) - Low (High)-grade squamous intraepithelial lesion

**Table S2.** Relationship between GynTect methylation status at baseline (V0) and outcome in patients according to the grading of lesion at study entry (percentages per row may not add up to 100% due to rounding).

| Lesion | GynTect methylation status | Outcome     |             |             |       |
|--------|----------------------------|-------------|-------------|-------------|-------|
|        |                            | Regression  | Persistence | Progression | Total |
| CIN2   | Invalide                   | 2<br>(100%) | 0<br>(0%)   | 0<br>(0%)   | 2     |
|        | Negative                   | 12<br>(67%) | 5<br>(28%)  | 1<br>(6%)   | 18    |
|        | Positive                   | 3<br>(75%)  | 1<br>(25%)  | 0<br>(0%)   | 4     |
|        | Total                      | 17<br>(71%) | 6<br>(25%)  | 1<br>(4%)   | 24    |
| CIN3   | Invalide                   | 3<br>(100%) | 0<br>(0%)   | 0<br>(0%)   | 3     |
|        | Negative                   | 15<br>(56%) | 12<br>(44%) | 0<br>(0%)   | 27    |
|        | Positive                   | 2<br>(33%)  | 4<br>(67%)  | 0<br>(0%)   | 6     |
|        | Total                      | 20<br>(56%) | 16<br>(44%) | 0<br>(0%)   | 36    |
| CIN2/3 | Invalide                   | 5<br>(100%) | 0<br>(0%)   | 0<br>(0%)   | 5     |
|        | Negative                   | 27<br>(60%) | 17<br>(38%) | 1<br>(2%)   | 45    |
|        | Positive                   | 5<br>(50%)  | 5<br>(50%)  | 0<br>(0%)   | 10    |
|        | Total                      | 37<br>(62%) | 22<br>(37%) | 1<br>(2%)   | 60    |

**Table S3.** Relationship between cytology classified as low (LSIL)- and high (HSIL)- grade squamous intraepithelial lesion and methylation status at baseline (V0) in CIN2/3 patients with valid data for both diagnostic tests (Fisher's exact test: p=0.41).

| Cytology | GynTect methylation status |            |              |
|----------|----------------------------|------------|--------------|
|          | Negative                   | Positive   | Total        |
| ≤ LSIL   | 12<br>(92%)                | 1<br>(8%)  | 13<br>(100%) |
| HSIL     | 27<br>(77%)                | 8<br>(23%) | 35<br>(100%) |
| Total    | 39<br>(81%)                | 9<br>(19%) | 48<br>(100%) |

**Table S4.** Relationship between high-risk HPV types and methylation status at baseline (V0) in CIN2/3 patients with valid data for both diagnostic tests (Fisher's exact test:  $p < 0.01$ ).

| High risk HPV         | GynTect methylation status |            |              |
|-----------------------|----------------------------|------------|--------------|
|                       | Negative                   | Positive   | Total        |
| Other high-risk types | 24<br>(96%)                | 1<br>(4%)  | 25<br>(100%) |
| HPV16 or 18           | 15<br>(65%)                | 8<br>(35%) | 23<br>(100%) |
| Total                 | 39<br>(81%)                | 9<br>(19%) | 48<br>(100%) |
